# Supplementary material for: HCV genome-wide analysis for development of efficient culture systems and unravelling of antiviral resistance in genotype 4
Source: PubMed Central journal article supplement — Gut. 2021 Apr 8;71(3):627–42. doi: 10.1136/gutjnl-2020-323585 (PMC8862099; doi:10.1136/gutjnl-2020-323585), 2021-04-08
Supplement: gutjnl-2020-323585supp001.pdf [file gutjnl-2020-323585supp001.pdf]

*Supporting Documents*

Gut. <https://doi.org/gutjnl-2020-323585>

## **Hepatitis C virus genome-wide analysis for development of efficient culture systems and unravelling of antiviral resistance in genotype 4**

Long V. Pham<sup>1</sup>, Martin Schou Pedersen<sup>1,2</sup>, Ulrik Fahnøe<sup>1</sup>, Carlota Fernandez Antunez<sup>1</sup>, Daryl Humes<sup>1</sup>, Kristian Schønning<sup>2,3</sup>, Santscharay Ramirez<sup>1</sup> and Jens Bukh<sup>1</sup>

**Affiliation:** <sup>1</sup>Copenhagen Hepatitis C Program (CO-HEP), Department of Infectious Diseases, Hvidovre Hospital and Department of Immunology and Microbiology, Faculty of Health and Medical Sciences, University of Copenhagen, Denmark, <sup>2</sup>Department of Clinical Microbiology, Hvidovre Hospital, Hvidovre, Denmark, and <sup>3</sup>Department of Clinical Medicine, Faculty of Health and Medical Sciences, University of Copenhagen, Copenhagen, Denmark.

**A**

|         | 10               | 20       | 30         | 40         | 50     | 60         | 70     | 80   | 90      | 100        |              |
|---------|------------------|----------|------------|------------|--------|------------|--------|------|---------|------------|--------------|
| JFH1    | SMSYSWTGALITPCSP | EEEKLPIN | PLSNLSNLLR | YHNKVCYCTT | SKSASQ | RAKVTFFDRT | QVLDAH | YDVS | LKDIKLA | ASKVSARLLT | LEEACQLTPPHS |
| J6cc    |                  |          |            |            |        |            |        |      |         |            |              |
| J8cc    |                  | G        |            | M.F        | S.R    | L          |        | V    | Q.V     | R          | V.A          |
| DH8cc   |                  | G        |            | M.F        | S.R    | L          |        | V    | K       | Q.V        | R            |
| TNcc    | T                | V        | AA         | Q          | A      | H          | L      | S    | R       | C          | Q            |
| H77Ccc  |                  | AA       | Q          | A          | H      | L          | S      | R    | C       | Q          | L            |
| HCV1cc  | V                | AA       | Q          | A          | H      | L          | S      | R    | C       | Q          | L            |
| DBN3acc |                  | A        |            | H          | L      | S          | S      | R    | Q       | L          | D            |
| HK2cc   |                  | AA       |            | I          | H      | M          | S      | R    | L       | Q          | V            |
| HK6acc  |                  | AA       |            | I          | H      | M          | S      | R    | L       | Q          | V            |
| ED43    | V                | AA       | S          | S          | H      | M          | A      | TR   | VT      | Q          | L            |

  

|         | 110 | 120           | 130  | 140      | 150  | 160        | 170 | 180  | 190      | 200 |
|---------|-----|---------------|------|----------|------|------------|-----|------|----------|-----|
| JFH1    | YGF | GAKEVRSLSGRAV | NHKS | VWKDLIED | PQTP | PTTIMAKNEV | FC  | VDPA | KGKKPARL | I   |
| J6cc    |     |               |      |          |      |            |     |      |          |     |
| J8cc    |     | R             | R    | E        | QH   | D          |     | I    | T        |     |
| DH8cc   |     | R             | R    | E        | QH   | E          |     | S    |          |     |
| TNcc    | F   | Y             | D    | CHARK    | N    | SV         | D   | Q    | E        | R   |
| H77Ccc  | F   | Y             | D    | CHARK    | A    | N          | SV  | D    | Q        | E   |
| HCV1cc  | F   | Y             | D    | CHARK    | T    | N          | NV  | D    | Q        | E   |
| DBN3acc | F   | Y             | S    | D        | SK   | I          | Q   | R    | E        | TT  |
| HK2cc   |     | Y             | QD   | HASK     | D    | R          | E   | SD   |          | S   |
| HK6acc  |     | Y             | QD   | HASK     | R    | E          | SD  |      | S        | R   |
| ED43    | F   | Y             | D    | H        | R    | K          | I   | S    | D        | NN  |

  

|         | 210 | 220   | 230    | 240   | 250 | 260   | 270 | 280  | 290    | 300 |
|---------|-----|-------|--------|-------|-----|-------|-----|------|--------|-----|
| JFH1    | VEY | LLKWA | EAKKDP | MGFSY | DT  | TRCFD | STV | TERD | IRTEES | TY  |
| J6cc    |     | F     |        |       |     |       |     |      |        |     |
| J8cc    |     | DF    |        | GS    |     |       |     |      |        |     |
| DH8cc   |     | DF    |        | GS    |     |       |     |      |        |     |
| TNcc    |     | F     | VQ     | KS    | T   | N     | A   | C    | D      | DPQ |
| H77Ccc  |     | F     | VQ     | KS    | T   | S     | A   | C    | D      | DPQ |
| HCV1cc  |     | DF    | VQ     | KS    | T   | S     | A   | C    | D      | DPQ |
| DBN3acc |     | R     | M      | TS    | T   | L     | A   | I    | Q      | V   |
| HK2cc   |     | M     | RS     | V     | N   | D     | S   | Q    | DPA    | K   |
| HK6acc  |     | M     | RS     | V     | N   | D     | S   | Q    | DPV    | R   |
| ED43    | F   | T     | KS     | T     | K   | V     | EV  | C    | D      | EP  |

  

|         | 310  | 320   | 330   | 340  | 350 | 360   | 370   | 380  | 390   | 400    |
|---------|------|-------|-------|------|-----|-------|-------|------|-------|--------|
| JFH1    | AACK | AAGIV | APTML | VCGD | DLV | ISESQ | GTEED | ERNL | RAFTE | AMTRYS |
| J6cc    |      | I     |       |      |     |       |       |      |       |        |
| J8cc    |      | D     | V     |      | N   |       |       |      |       |        |
| DH8cc   |      | Q     | D     | V    |     | ND    |       |      |       |        |
| TNcc    |      | R     | LQDC  |      | C   | A     | VQ    | AAS  |       | Q      |
| H77Ccc  |      | R     | LQDC  |      | C   | A     | VQ    | AAS  |       | Q      |
| HCV1cc  |      | R     | LQDC  |      | C   | A     | VQ    | AAS  |       | Q      |
| DBN3acc |      | A     | LRN   | DF   | VA  | D     | VS    | RAA  |       | A      |
| HK2cc   |      | R     | N     | KDYD | C   | A     | VQ    | TAS  |       | D      |
| HK6acc  |      | R     | N     | KDCD | C   | A     | VQ    | TES  |       | D      |
| ED43    |      | IR    | LRDC  |      | A   | D     | V     | N    | A     | A      |

  

|         | 410  | 420   | 430  | 440 | 450 | 460 | 470 | 480   | 490 | 500 |
|---------|------|-------|------|-----|-----|-----|-----|-------|-----|-----|
| JFH1    | RHSP | INSLG | NIQY | APT | I   | WVR | MLM | THFFS | ILM | VQD |
| J6cc    |      | V     |      | A   |     |     |     |       |     |     |
| J8cc    |      | V     |      | I   |     | LA  | N   |       | A   | S   |
| DH8cc   |      | V     |      | I   |     | LA  | N   |       | A   | S   |
| TNcc    |      | T     | V    | MF  | L   | A   | I   | V     | IAR | Q   |
| H77Ccc  |      | T     | V    | MF  | L   | A   | I   | V     | IAR | Q   |
| HCV1cc  |      | T     | V    | MF  | L   | A   | I   | V     | IAR | Q   |
| DBN3acc |      | T     | V    | M   |     | M   |     | QS    | EI  | RP  |
| HK2cc   |      | T     | V    | MF  |     |     |     | QS    | EQ  | EKA |
| HK6acc  |      | T     | V    | MF  |     |     |     | QS    | EQ  | GKA |
| ED43    |      | T     | V    |     |     |     |     | QS    | EA  | EKA |

  

|         | 510 | 520 | 530  | 540 | 550  | 560 | 570 | 580 | 590 |
|---------|-----|-----|------|-----|------|-----|-----|-----|-----|
| JFH1    | KSR | RAV | RASL | IS  | RGKA | AV  | CG  | RYL | FN  |
| J6cc    |     | R   |      |     |      |     |     |     |     |
| J8cc    |     | AQ  | AR   | I   |      | SR  | G   |     | G   |
| DH8cc   |     | AQ  | I    |     |      | SR  | G   |     | G   |
| TNcc    | RH  | N   | R    | L   | R    | I   | K   | R   | IAA |
| H77Ccc  | RH  | S   | R    | L   | R    | I   | K   | R   | IAA |
| HCV1cc  | RH  | S   | R    | L   | R    | I   | K   | R   | IAA |
| DBN3acc | RH  | S   | R    | L   | R    | I   | K   | R   | IAA |
| HK2cc   | RH  | S   | R    | L   | R    | I   | K   | R   | IAA |
| HK6acc  | RH  | S   | R    | L   | R    | I   | K   | R   | IAA |
| ED43    | RH  | S   | R    | L   | R    | I   | K   | R   | IAA |

**B**

```

10      20      30      40      50      60      70      80      90      100
ED43-consensus  MSTNPKPQRKTKRNTNRRPMDVKFPGGGQIVGGVYLLPRRGPRLGVRAARTKTSERSQPRRRQP I PKARRPEGRSWAQPYPWPLYGNEGCGWAGWLLSP
ED43cc          .....

110     120     130     140     150     160     170     180     190     200
ED43-consensus  RGRSPSWGPNDRRRSRNLKVIDTLTCGFADLMGYIPLVGPVGGVARRALAHGVRALEDGINYATGNLPGCSFSIFLLALLSCLYVPASAVNVRNVSGI
ED43cc          .....

210     220     230     240     250     260     270     280     290     300
ED43-consensus  YHVTNDCPNSSIVYEADHHLHLPGCVPCVREGNQSRVVALTPVAAPYI GAPLESLSHVDLMVGAATVCSGLYIGDLCCGGLFVVGQMFSPFRPRHWT
ED43cc          .....G.....

310     320     330     340     350     360     370     380     390     400
ED43-consensus  TQDCNCSIYTGHTGHRMADMMNWSPTTLVLAQVMRIPPTLVDLLSGGHGVLGVVAYFSMQANWAKVILVLFAGVD AETHVSGAAVGRSTAGLA
ED43cc          .....

410     420     430     440     450     460     470     480     490     500
ED43-consensus  NLFSGSKQLQLINSNGSWHINRTALNCNDSLNTGFLASLFYTHKFNSSGCSERLACCKSLDSYGGGWPGLGVANISGSSDRPVCWHYAPPCGI VPA
ED43cc          .....R.....

510     520     530     540     550     560     570     580     590     600
ED43-consensus  SSVCGPVCYFTSPFVVGTTDHSVGTPTWGENETDVFLLNSTRPPHGAWFVGVMMNSTGRTKTCGAPPEVNTNNGTWHCPDPCRKHPE TTYAKCGSG
ED43cc          .....

610     620     630     640     650     660     670     680     690     700
ED43-consensus  PWITPRCLIDYPYRLWHFPCANFVFNIRTFVGGIEHRMQAACNWTGVEVGLERDRVLSPLLLTTAWQILPCSF TTPALSTGLIHLHQIVDVQ
ED43cc          .....

710     720     730     740     750     760     770     780     790     800
ED43-consensus  YLYGVGSVAVSWALKWEVVLAFLLADARVSACLWMMFMVSVQVEAALSNIININAASAAGAQGFVYALFICIVVHWKGRFPAAAAA YAACGLWPLFLLL
ED43cc          .....

810     820     830     840     850     860     870     880     890     900
ED43-consensus  LMLPERAYAYDEVAGSLGGAIVVMLTILTLSPHYKWLARGLWNIQYFIARTEAVLHVYIPSNVVRGPRDSVIVLAVLVCPHLVFDITKYL LAILGPLH
ED43cc          .....A.....C.....

910     920     930     940     950     960     970     980     990     1000
ED43-consensus  ILQASLLRIPYFVRAQALVKICSLLRGVVYKQYQMVVLKAGALGTIYIDHLPMSDWAATGLRDLVALEPVVFTPMEKKVIVWGADT AACGDIIRGL
ED43cc          .....

1010    1020    1030    1040    1050    1060    1070    1080    1090    1100
ED43-consensus  PVSARLNEILLGPADTETSKGWRLAPITAYAQTGRFLFSTIVTSLTGRD TNENCGEVQLSTATQSF LGTAVNGVMVTYVHGAGAKTISGPKGPVNQM
ED43cc          .....

1110    1120    1130    1140    1150    1160    1170    1180    1190    1200
ED43-consensus  YTNVDQLVGVWAPPVGRSLAPCTCGSADLYLVTRHADVI PVRRRGDTRGALLSPRPIS TLKGS GGPLCPMGAAGIFRAAVCTRGVAKAVDFVPVES
ED43cc          .....

1210    1220    1230    1240    1250    1260    1270    1280    1290    1300
ED43-consensus  LETTMRSPVFTDNSTPPAVPQTYQVAHLHAPTSGSKSTKVPAAYAAQGYKVLVLPNSVAATLGFVYMSKAYGIDPNIRSGVRTITTTGAPIT YSTYKFL
ED43cc          .....V.....

1310    1320    1330    1340    1350    1360    1370    1380    1390    1400
ED43-consensus  ADGGCSGGAYDIIICDECHSTDSTTILGIGTVLDQAETAGVRLTVLATATPPGSVTPHNSIEEVALPTTGEIPFYKAI PLELIKGRHILFCHSKKCC
ED43cc          .....

1410    1420    1430    1440    1450    1460    1470    1480    1490    1500
ED43-consensus  DELARQLTSLGLNAVAYYRGLDVSVIPTSGDVVVCATDALMTGFTGDFSDVICNTSVIQTVDFSLDPTFSIETTTPQDAVSRSRRRGRTRGRGLTYR
ED43cc          .....GM.....

1510    1520    1530    1540    1550    1560    1570    1580    1590    1600
ED43-consensus  YVTPGERPSGMFDTAVLCECYDAGCAWYELTPAETTRRLKAYFDTPGLPVCQDHLFEVSVFTGLTHIDGHFLSQTQSGENFPYIVAYQATVCAKALAP
ED43cc          .....L.....

```

```

1610 1620 1630 1640 1650 1660 1670 1680 1690 1700
ED43-consensus PPSWDTMWKLRLKPLTHGPTPLLYRLGSVQNEVVLTHPI TKYIMACMSADLEVVTSTWVLVGGVLAALAAAYCLSVGSVVIVGRVVLSSGQPAVIPDREV
ED43cc .....S.....

1710 1720 1730 1740 1750 1760 1770 1780 1790 1800
ED43-consensus LYQQFDEMEEC SKHLP LVEHGLQLAEQFKQKALGLLNFAGKQAQEA TPVQSNFAKLEQFWAKHMWNFISGIQVLAGLSTLPGNPAIASLMSFTAAVTSP
ED43cc .....V.....

1810 1820 1830 1840 1850 1860 1870 1880 1890 1900
ED43-consensus LTTQQTLLFNILGGWVASQIATPTASTAFVVSGLAGA AVGSVGLGKILVDILAGY GAGVAGAVVTFKIMSGEMPSTEDLVNLLPAILSPGALVVGVC AA
ED43cc .....A.....A.....N.....

1910 1920 1930 1940 1950 1960 1970 1980 1990 2000
ED43-consensus LLRRHVGPGEAGVQWMNRLIAFASRGNHVSPTHYVPE SDAARVTTLLSSLVTVSLLRRLHKWINEDCSTPCAESWLWVWVWCVTLSDFKTLWKALL
ED43cc .....A.....T.....

2010 2020 2030 2040 2050 2060 2070 2080 2090 2100
ED43-consensus PLMPGIPFFLSCQRGYKGEWRGDGMHTTFCPGADLAGH IKNGSMRITGPKTCSNTWHGTFFINAYTTGGVPI PAPANFKFALWRVSAEDVVEVRRVGFH
ED43cc .....

2110 2120 2130 2140 2150 2160 2170 2180 2190 2200
ED43-consensus YVTGVTQDNKCPQVPAPEFFTEVDGIRLHRHAPCKP LLRDEVSFVGLNSFVVGSQLPCEPEPDVAVLTSMLTDP SHITAESARRRRLARGSRP SLAS
ED43cc .....

2210 2220 2230 2240 2250 2260 2270 2280 2290 2300
ED43-consensus SSASQLSAPSLKATCTAPHDSPTGLLEANLLWGSTAT RVE TDEKVIILDSFESVVAEPNDREVSVAEILRPTK KFPALPIWARPDNPNPLTETWKQ
ED43cc .....T.....

2310 2320 2330 2340 2350 2360 2370 2380 2390 2400
ED43-consensus QDYKPTVHGICALPPGKQPPVPPRRKRTVQLTESV VSTALAE LAAKTFGQSEPSDRD TDLTPTETD SGPIVVDDASDDGSYSSMPLEGE PGD PDL
ED43cc .....A.....

2410 2420 2430 2440 2450 2460 2470 2480 2490 2500
ED43-consensus TSDSWTSVGSSEVVCCSMSYSW TGALVTPCAAESEKLPISPLNSLLRHHNMVYATTRS AVTRQKVTFDRLQVVD SHYNEVLKIKARASRVKARLL
ED43cc .....G.....

2510 2520 2530 2540 2550 2560 2570 2580 2590 2600
ED43-consensus TTEACDLTPPHSARSKFGYGA KDVRSHSRKAINHIS SVWKDLLDNNTP IPTTIMAKNEVFAVNP AKGGRKPARLIVY PDLGVRVCEKRALHDVIK KLP
ED43cc .....E.....N.....

2610 2620 2630 2640 2650 2660 2670 2680 2690 2700
ED43-consensus EAVMGAAYGFQYSPAQRVEFLLTAWKSKKTFMGFSY DTRCFDSTVTEKDIRVEEVYQC CDLEPEARKVITALTDRLYVGGPMHNSKGDLCGYRRCR ASG
ED43cc .....E.....

2710 2720 2730 2740 2750 2760 2770 2780 2790 2800
ED43-consensus VYTTSFGNLTTCYLKATAAIRAAGLRDCTMLVCGDD LVVIAESDGEEDNRALRAFTEAMTRY SAPPGDAPQPAYDLELITSCSSNVSV AHDVTGKVVYY
ED43cc .....A.....R.....

2810 2820 2830 2840 2850 2860 2870 2880 2890 2900
ED43-consensus LTRDPETPLARA AWETVRHTFPVNSWLGNIIVYAPT I WVRMLMTHFFSILQSQEAL EKALDFDMYGV TYSITPLDLP AI IQRLHGLSAFTLHGYS PHELN
ED43cc .....T.....

2910 2920 2930 2940 2950 2960 2970 2980 2990 3000
ED43-consensus RVAGALRKLGVPLRAWHRARAVRAKLIAGGRAKICG IYLFNWA VKTKLKLTPLPAAAKLDL SGWFTV GAGGGDIYHSM SHARPRYLLCLLLLVGV
ED43cc .....V.....G.F.VP.....RY.....

.....
ED43-consensus GIFLLPAR
ED43cc .....

```

**Supplemental Figure 1. Alignment of different HCV sequences. (A)** Alignment of HCV NS5B genotypes 1-4 and 6. NS5B sequences from JFH1cc (2a)(1), J6cc (2a)(2), J8cc (2b)(2), DH8cc (2b)(3), TNcc (1a)(4), H77Ccc (1a)(5), HCV1cc (1a)(5), DBN3acc (3a)(6), HK2cc (6a)(7), and HK6acc (6a)(7) viruses were aligned with corresponding sequence of ED43 (4a)(8). Red boxes indicate residues of ED43, which are different from JFH1 and all other culture strains included from our prior studies. **(B)** Alignment of HCV sequences from ED43 consensus clone and ED43cc. The polyprotein sequence of ED43 consensus (8) was aligned with the corresponding sequence of ED43cc virus. The red, blue, and pink boxes indicate the NS3/4A (aa 1027-1711), NS5A (aa 1973-2417), and NS5B (aa 2418-3008) sequences, respectively.

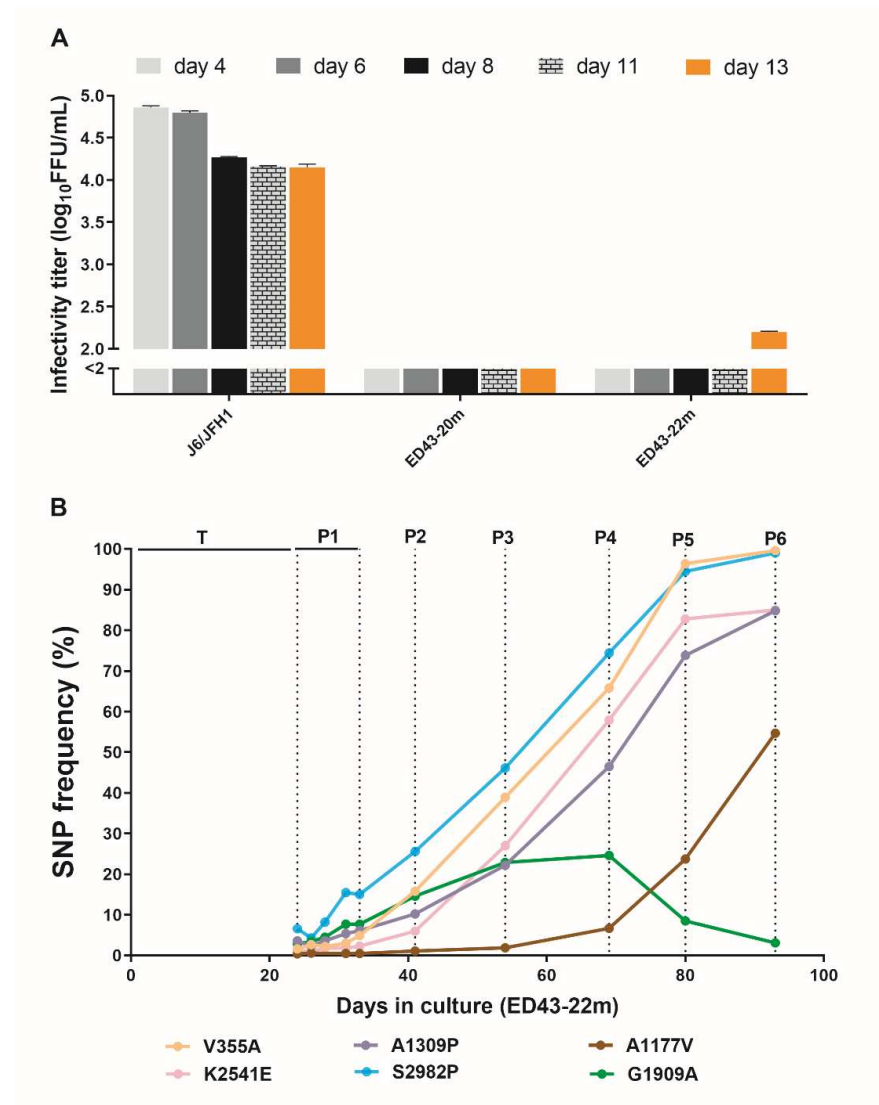

**Supplemental Figure 2. Viability of the recombinant ED43-22m following transfection of Huh7.5 cells and emergence of substitutions during virus passages.** ED43-22m originated from ED43-20m with the addition of substitutions L1466M(NS3) and K2597N(NS5B), the first dominant changes emerging during passage of ED43-20m viruses (see Figure 1B). (A) The infectivity titers were determined by FFU assays and shown by mean of triplicates  $\pm$  SEM (y-axis). J6/JFH1 was included as a control. Y-axis break indicates cut-off of the assay. (B) NGS analysis of recovered viruses. Only substitutions that developed in  $>$  20% of the virus population at any time points are shown. Samples were not collected during the transfection (T). Black dashed lines showed samples taken during the indicated cell-free passages of supernatant viruses (P1, 2, 3, etc.).

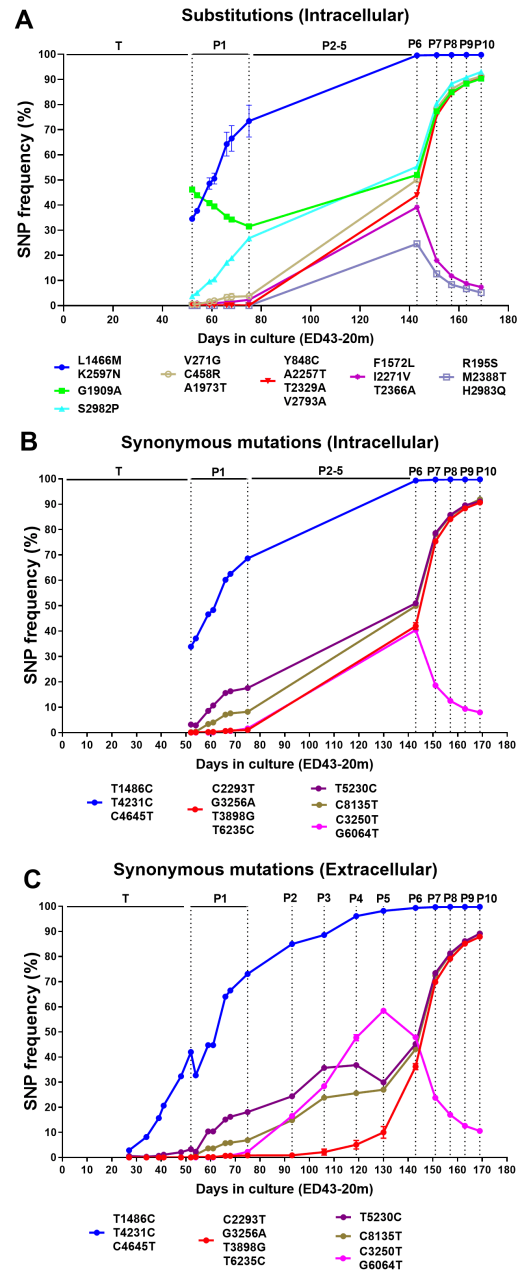

**Supplemental Figure 3. Evolution of substitutions and synonymous mutations in culture adaptation of ED43 full-length recombinant ED43-20m, determined by NGS.** Only SNPs with frequencies of >20% at any time points are shown. For SNPs that emerged with similar patterns, means  $\pm$  SEM are shown instead. Black dashed lines showed samples taken during the indicated passages (P1, 2, 3, etc.). (A,B)

SNP frequencies of substitutions (panel A) and synonymous mutations (panel B), determined from intracellular viral RNA. The numbers refer to amino acid positions of the ED43 polyprotein (panel A) or nucleotide positions of the ED43 genome (panel B). Samples were not collected during the transfection (T) and serial passages P2-5. (C) SNP frequency of synonymous mutations determined from extracellular viral RNAs. The numbers refer to nucleotide positions of the ED43 genome. Samples were not collected during the transfection (T) from days 0 to 27. See also Figure 1B.



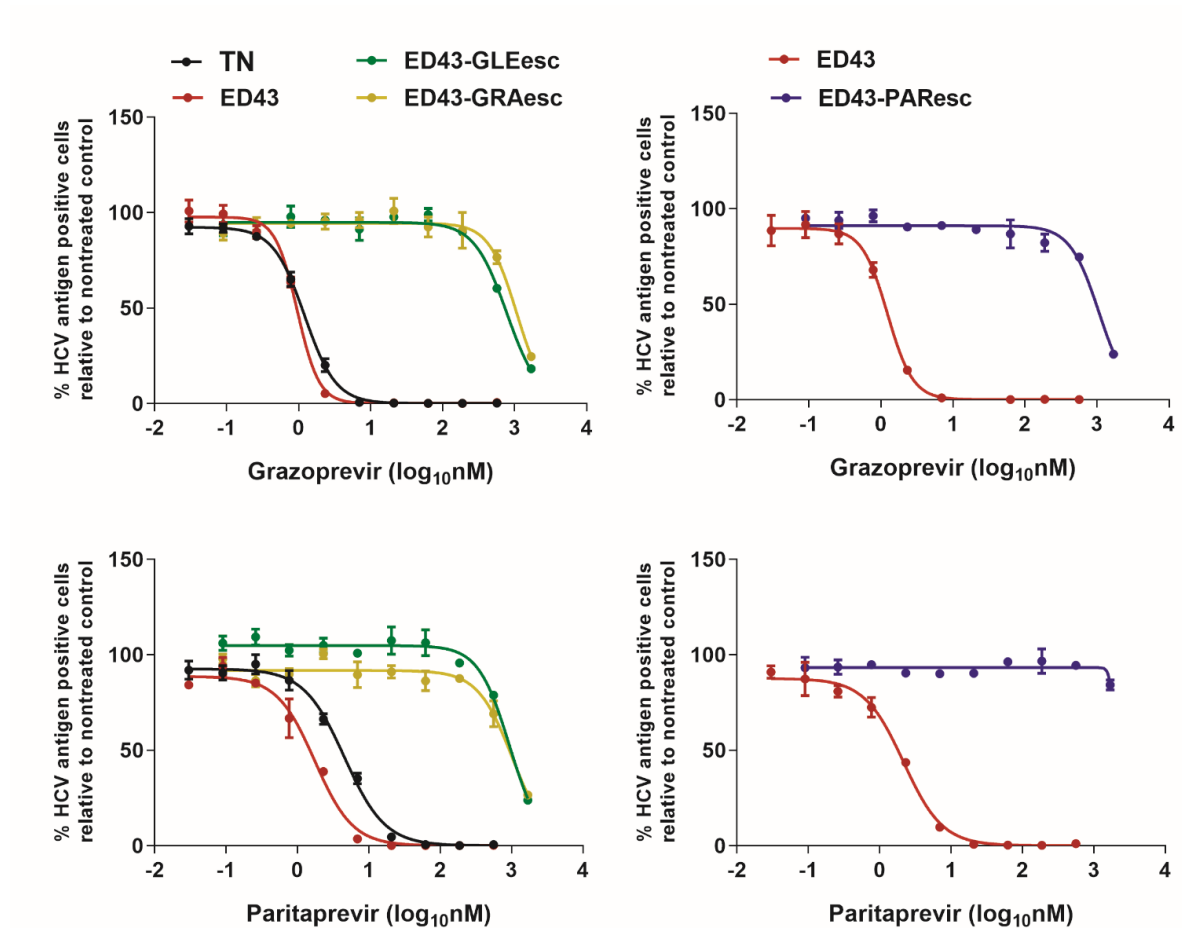

**Supplemental Figure 4: Efficacy of protease inhibitors (PIs) against HCV genotype 4a (ED43) full-length culture viruses.** Huh7.5 cells were seeded on 96-well plates overnight, then infected with the indicated viruses for 24 hours. The cells were subsequently treated with specific inhibitors for an additional 48 hours before analysis as described (7, 9). Values are means of triplicates  $\pm$ SEM. The original ED43 virus was used in these 2 experiments as a control. TN (1a) virus was included for comparison. See also Figure 2D,E.

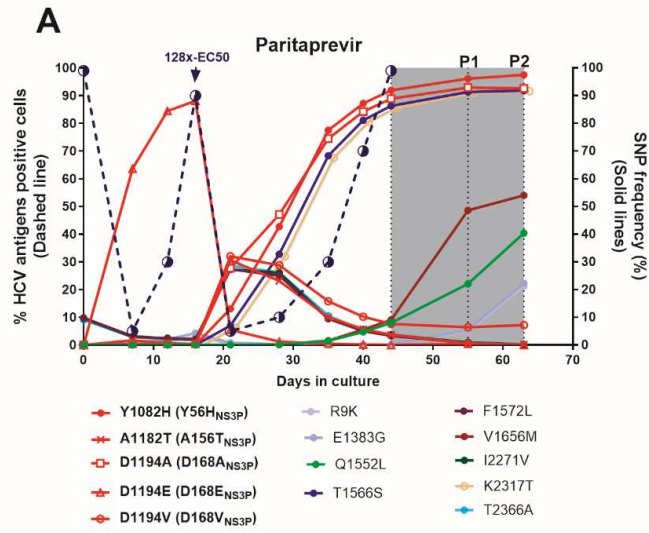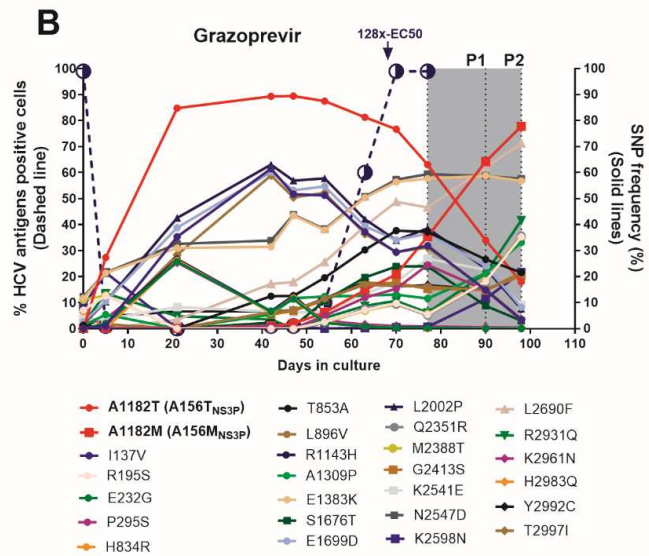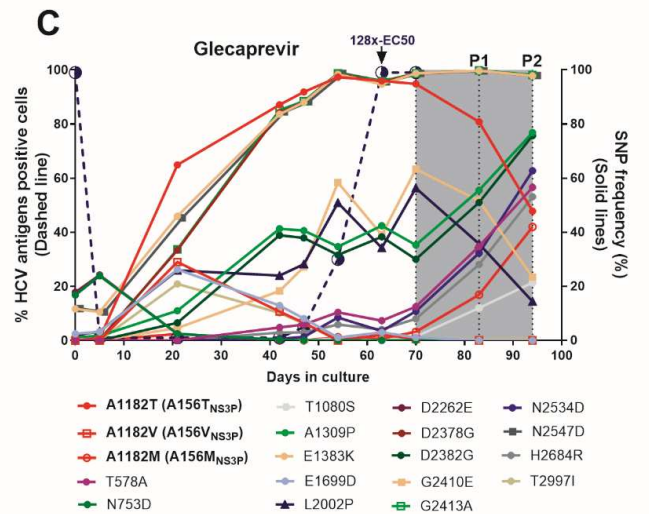

**Supplemental Figure 5. NGS analysis of complete ORFs of ED43 escape viruses from treatments with protease inhibitors.** (A-C) The frequencies of non-synonymous mutations in ORFs of the escape viruses under treatments with paritaprevir (A), grazoprevir (B) and glecaprevir (C), were analyzed by NGS as described (7). Only SNPs forming less than 20% of the genome population at day 0 that then emerged to represent more than 20% at least one-time point during treatment are shown. The putative RASs are shown in red with protein-specific numbers (in parentheses). Dashed line indicates HCV-antigen positive cells during the treatment. Shaded backgrounds indicate 1<sup>st</sup>- and 2<sup>nd</sup> passages without drugs (drug-free) using the samples from the last timepoint in each treatment experiment. See also Figure 2A-C.

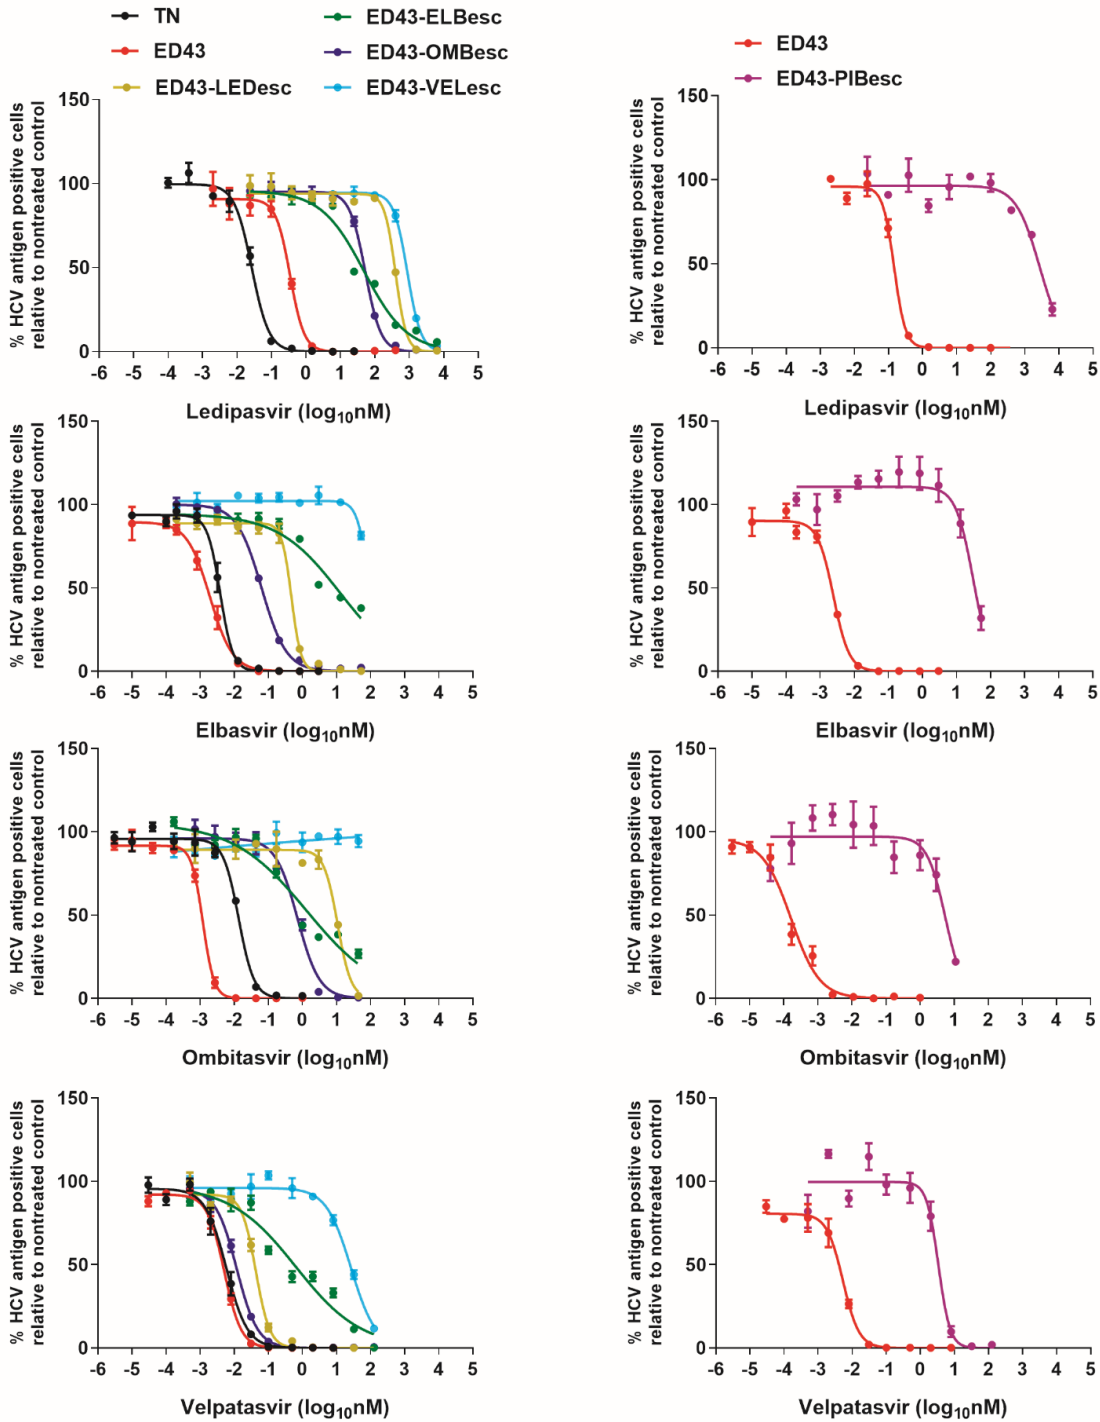

**Supplemental Figure 6: Efficacy of NS5A inhibitors against HCV genotype 4a (ED43) viruses.**

Huhu7.5 cells were seeded on 96-well plates overnight, then infected with the indicated viruses for 24 hours. The cells were subsequently treated with specific inhibitors for an additional 48 hours before analysis as described (7, 9). Values are means of triplicates  $\pm$ SEM. The original ED43 virus was used as a control. TN (1a) virus was included for comparison. See also Figure 3F,G.

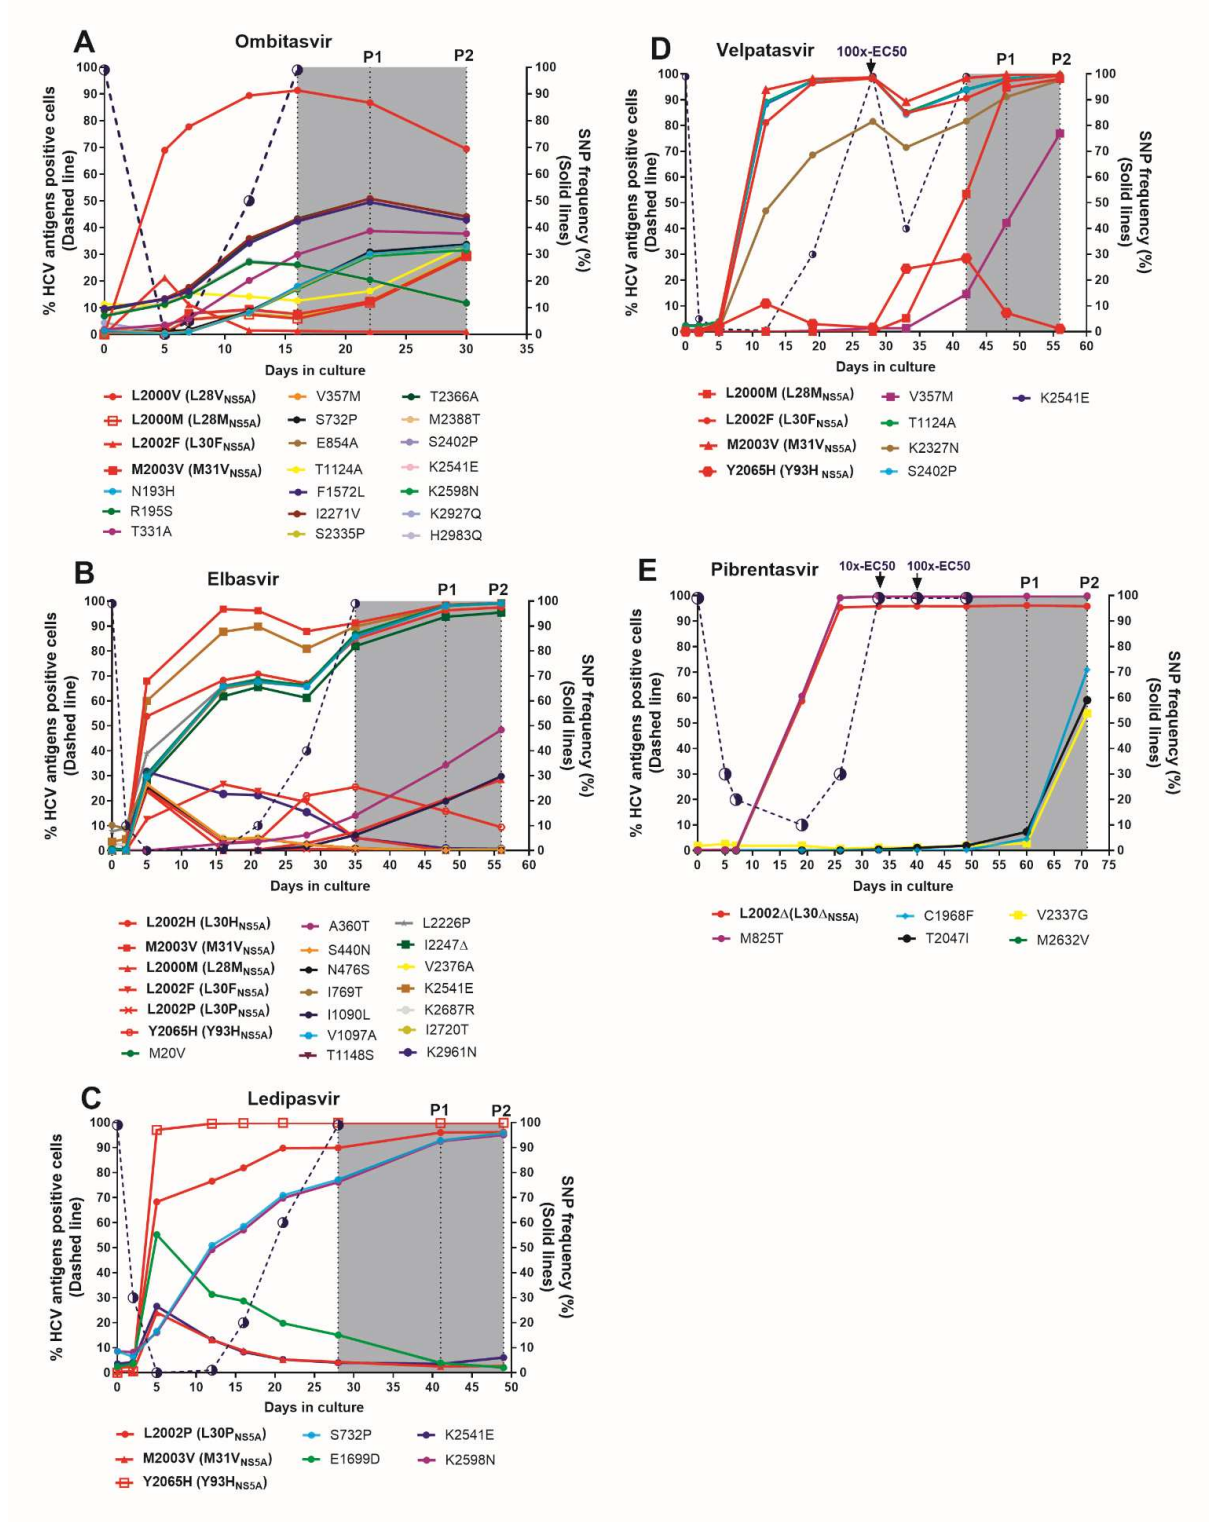

**Supplemental Figure 7. NGS analysis of complete ORFs of ED43 escape viruses from treatments with NS5A inhibitors. (A-E)** The frequencies of non-synonymous mutations in ORFs of the escape viruses under treatments with ombitasvir (A), elbasvir (B), ledipasvir (C), velpatasvir (D) and pibrentasvir (E), were analyzed by NGS as described (7). Only SNPs forming less than 20% of the genome population at day 0 that then emerged to represent more than 20% at least one-time point during treatment are shown. The putative RASs are shown in red with protein-specific numbers (in parentheses). Dashed line indicates HCV antigen positive cells during the treatment. Shaded backgrounds indicate 1<sup>st</sup>- and 2<sup>nd</sup> passages without drugs (drug-free) using the samples from the last timepoint in each treatment experiment. See also Figure 3A-E.

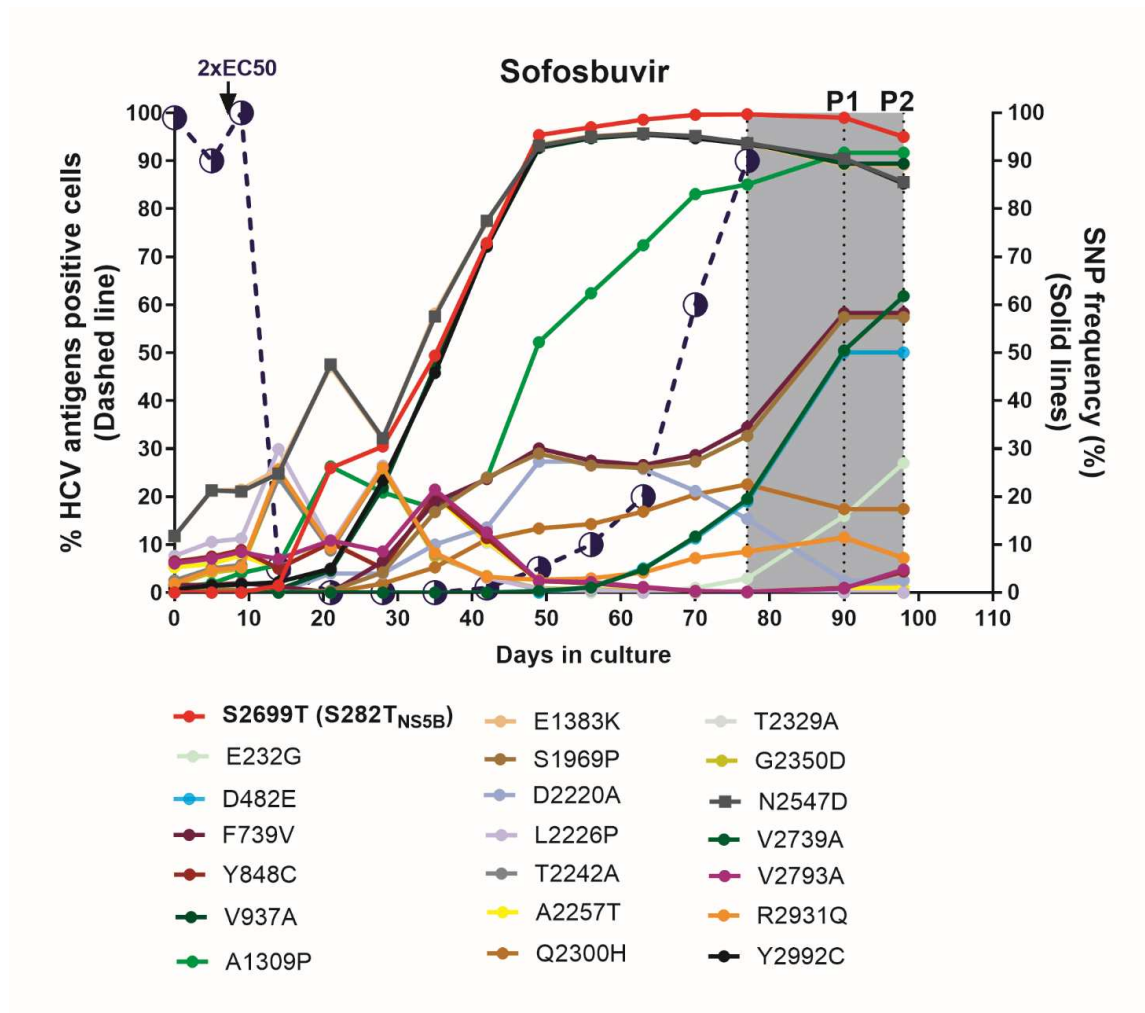

**Supplemental Figure 8. NGS analysis of complete ORFs of ED43 escape viruses from treatments with sofosbuvir.** The frequencies of non-synonymous mutations in ORFs of the escape viruses under treatment with sofosbuvir, were analyzed by NGS as described (7). Only SNPs forming less than 20% of the genome population at day 0 that then emerged to represent more than 20% at least one-time point during treatment are shown. The putative RASs are shown in red with protein-specific numbers (in parentheses). Dashed line indicates HCV-antigen positive cells during the treatment. Shaded backgrounds indicate 1<sup>st</sup>- and 2<sup>nd</sup> passages without drugs (drug-free) using the samples from the last timepoint in each treatment experiment. See also Figure 4A.



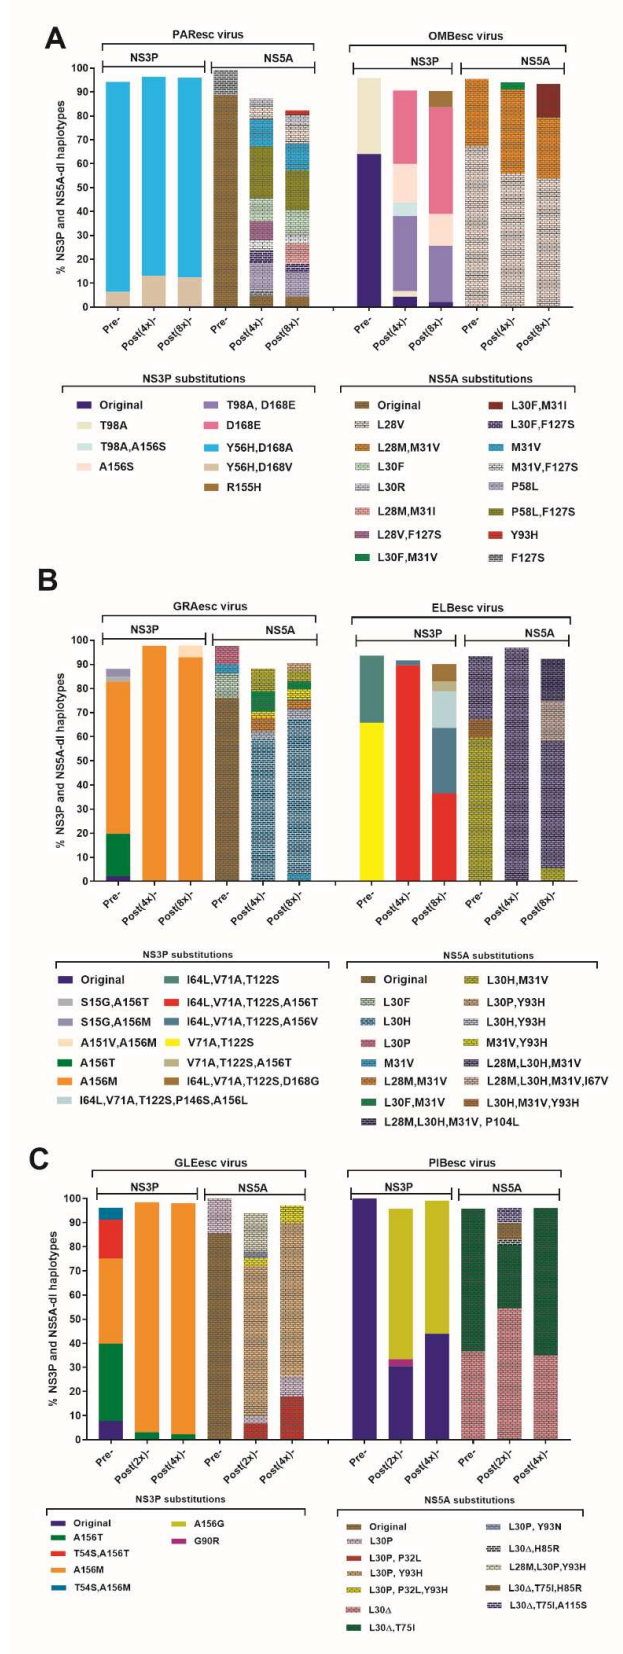

**Supplemental Figure 9: Distributions of haplotypes in viruses after treatment with DAA combinations containing PIs and NS5A inhibitors. (A-C)** Linkage analysis showed distributions of haplotypes in viruses that escaped from treatments with paritaprevir/ombitasvir (A), grazoprevir/elbasvir (B), and glecaprevir/pibrentasvir (C). For each combination, 2 different concentrations of PIs were used as outlined in Figure 5. Only haplotypes accounting for  $\geq 2\%$  of the viral population are shown. PAR, OMB, GRA, ELB, GLE, and PIB: paritaprevir, ombitasvir, grazoprevir, elbasvir, glecaprevir, and pibrentasvir, respectively. PAResc, GRAesc, GLEesc, OMBesc, ELBesc, and PIBesc: the virus that escaped from single treatments with paritaprevir, grazoprevir, glecaprevir (as shown in Figure 2), ombitasvir, elbasvir, and pibrentasvir (as shown in Figure 3), respectively. See also Figure 5.

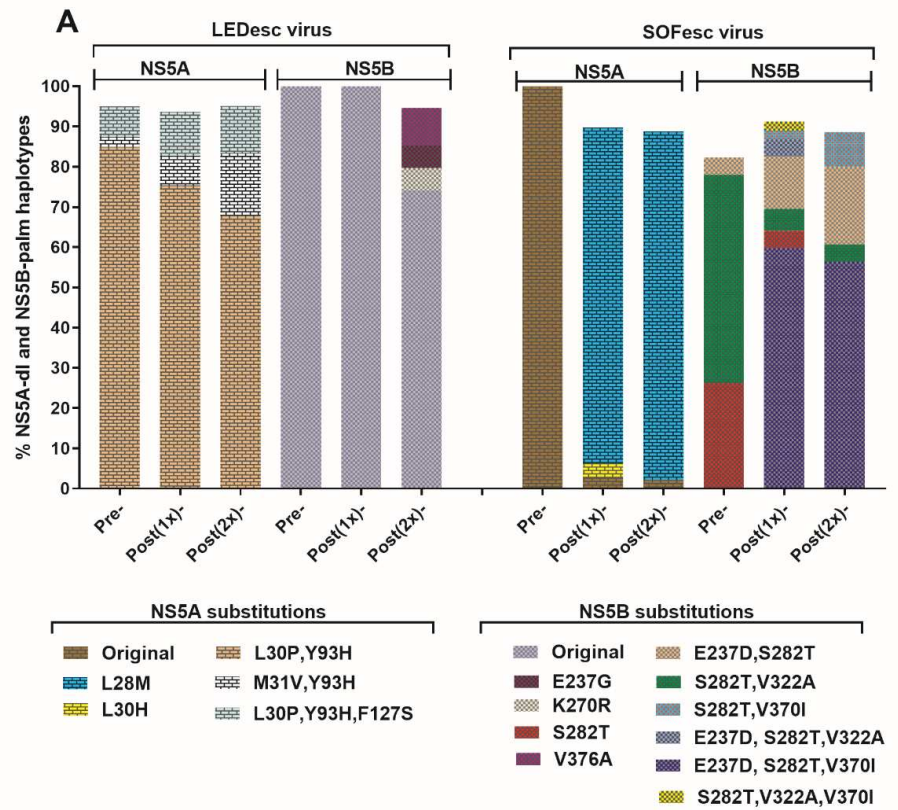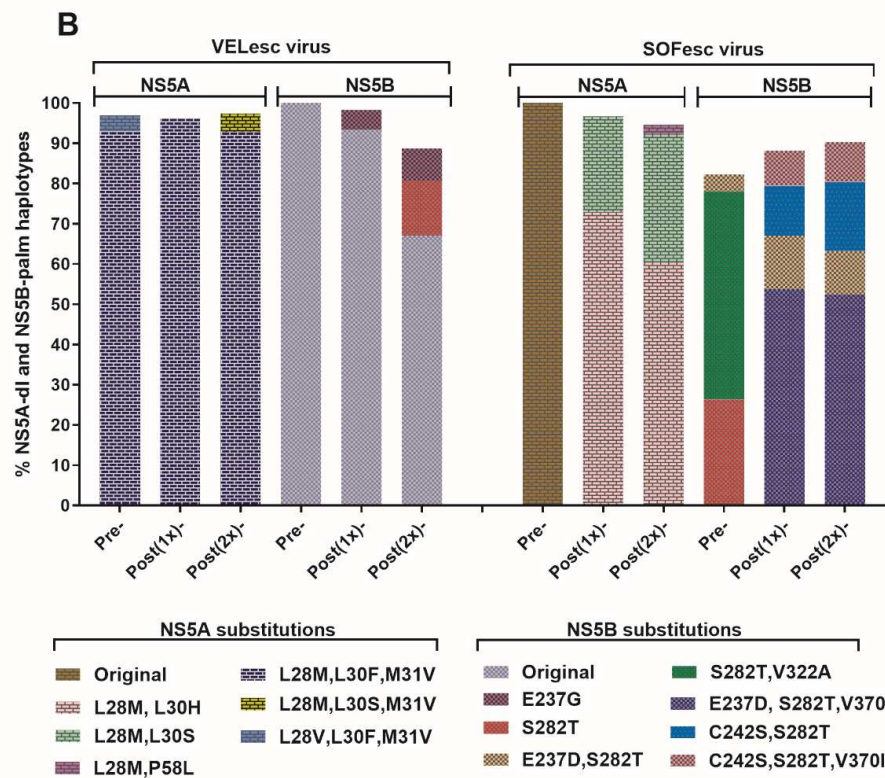

**Supplemental Figure 10: Distributions of haplotypes in viruses after treatment with DAA combinations containing NS5A inhibitors and sofosbuvir. (A,B)** Linkage analysis showed distributions of viral haplotypes after treatments with ledipasvir/sofosbuvir (A) and velpatasvir/sofosbuvir (B). For each DAA combination, the concentrations of 5x-EC<sub>50</sub> of NS5A inhibitors were used in combination with either 1x- or 2x-EC<sub>50</sub> of sofosbuvir. For details, see legend of Supplemental Figure 9. LED, VEL, and SOF: ledipasvir, velpatasvir, and sofosbuvir, respectively. LEDesc, VELeSc, and SOFesc: the virus that escaped from single treatments with ledipasvir, velpatasvir (as shown in Figure 3), and sofosbuvir (as shown in Figure 4), respectively. See also Figure 6.

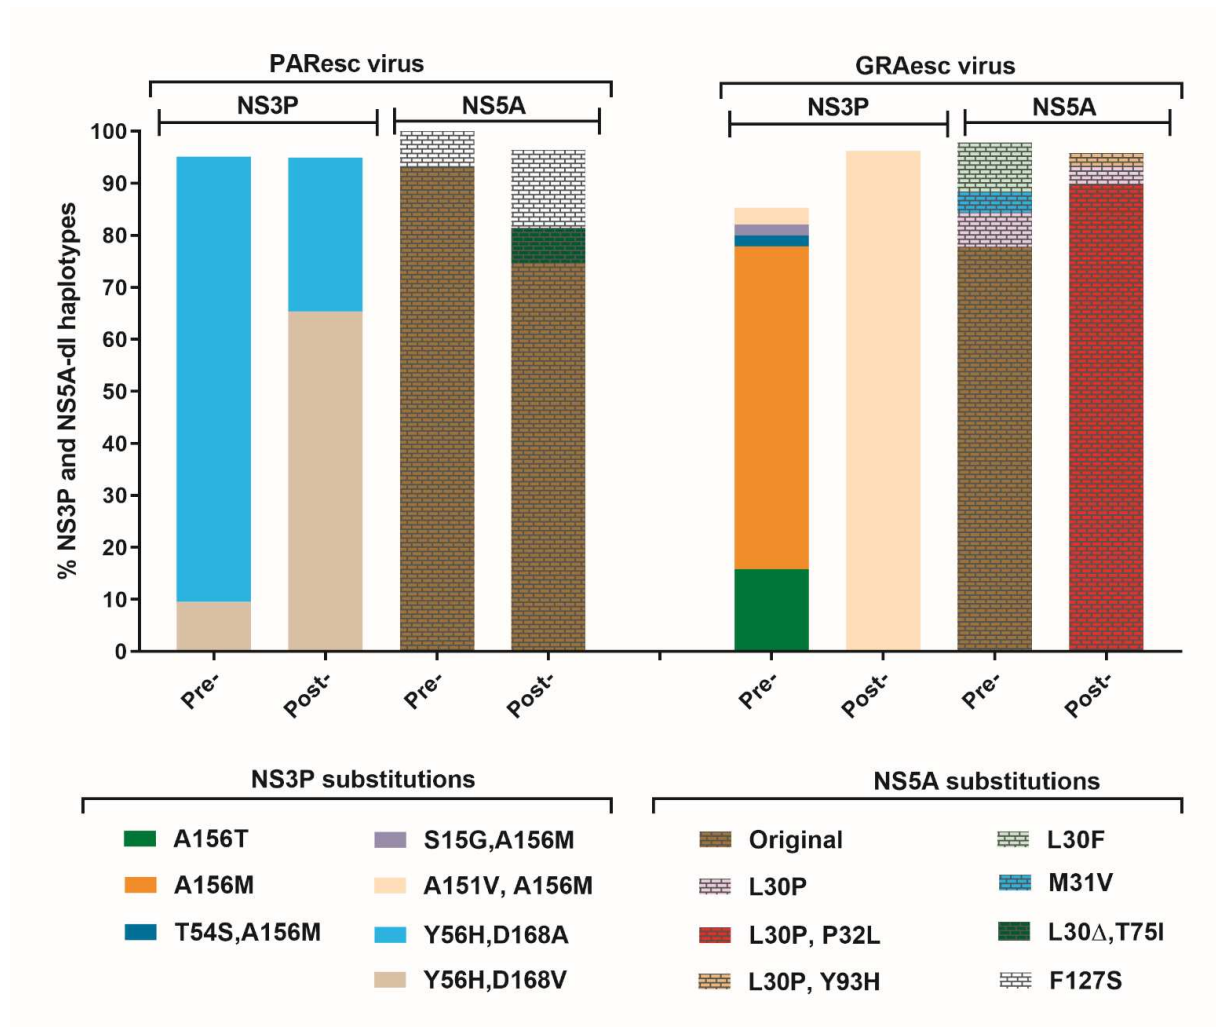

**Supplemental Figure 11. Distributions of viral haplotypes after treatment with DAA combination glecaprevir/pibrentasvir.** The concentrations of 4x-EC<sub>50</sub> of glecaprevir in combination with 5x-EC<sub>50</sub> of pibrentasvir were used for treatments. For details, see Supplemental Figure 9 legend. GRAesc, PAResc: the virus escaped from single treatments with grazoprevir, paritaprevir (as shown in Figure 2), respectively. See also Figure 7.

**Supplemental Table 1.** Sanger sequencing analysis of recovered ED43(C5A) viruses.

|                   |                                         | HCV gene                                  | NS2  | NS3  | NS3  | NS3                | NS4A | NS4B | NS4B | NS4B | NS4B | NS5A |
|-------------------|-----------------------------------------|-------------------------------------------|------|------|------|--------------------|------|------|------|------|------|------|
|                   |                                         | ED43 nucleotide position                  | 2819 | 4211 | 4733 | 5054               | 5354 | 5697 | 5804 | 5933 | 5949 | 7578 |
|                   |                                         | Original nucleotide                       | A    | A    | A    | T                  | G    | C    | A    | A    | G    | A    |
| Recombinant virus | Second passage titer (day) <sup>a</sup> | Synonymous mutation                       |      |      |      |                    |      |      |      |      |      |      |
| ED43(C5A)-2m      | 4.0 (13)                                | T547C, T4303T/C, T5365A, T7255C, T7495T/C | G/a  | A/G  | .    | .                  | T    | T    | G    | G    | G/A  | .    |
| ED43(C5A)-7m      | 4.1 (13)                                | None                                      | G    | G    | .    | T/c/a              | T    | T    | G    | G    | A    | .    |
| ED43(C5A)-9m      | 4.2 (11)                                | None                                      | G    | G    | G    | .                  | T    | T    | G    | G    | A    | G    |
|                   |                                         | ED43 amino acid position                  | 827  | 1291 | 1465 | 1572               | 1672 | 1786 | 1822 | 1865 | 1870 | 2413 |
|                   |                                         | H77 amino acid position                   | 827  | 1291 | 1465 | 1572               | 1672 | 1786 | 1822 | 1865 | 1870 | 2416 |
|                   |                                         | Amino acid change                         | T-A  | I-V  | S-G  | F-L/I <sup>b</sup> | A-S  | A-V  | T-A  | T-A  | S-N  | D-G  |

**Note:** Nucleotide changes resulting in amino acid substitutions are shown. Letters with shaded background indicate the engineered mutations. Acquired mutations are indicated with only capital letters (complete nucleotide changes), or capital/capital letters (50/50 quasispecies), or capital/lower letters (major/minor change). "Dots" indicate identical nucleotides with the original sequence. "None"; no synonymous mutations were found in recovered viruses. See also Figure 1A.

<sup>a</sup>The infectivity titers are shown as log<sub>10</sub>FFU/mL.

<sup>b</sup>Nucleotide change T to C and T to A results in amino acid substitution F to L and F to I, respectively.

## Reference List

- 1 Wakita T, Pietschmann T, Kato T *et al.* Production of infectious hepatitis C virus in tissue culture from a cloned viral genome. *Nat Med* 2005;**11**(7):791-6.
- 2 Li YP, Ramirez S, Gottwein JM *et al.* Robust full-length hepatitis C virus genotype 2a and 2b infectious cultures using mutations identified by a systematic approach applicable to patient strains. *Proc Natl Acad Sci U S A* 2012;**109**(18):E1101-E1110.
- 3 Ramirez S, Li YP, Jensen SB *et al.* Highly efficient infectious cell culture of three hepatitis C virus genotype 2b strains and sensitivity to lead protease, nonstructural protein 5A, and polymerase inhibitors. *Hepatology* 2014;**59**(2):395-407.
- 4 Li YP, Ramirez S, Jensen SB *et al.* Highly efficient full-length hepatitis C virus genotype 1 (strain TN) infectious culture system. *Proc Natl Acad Sci U S A* 2012;**109**(48):19757-62.
- 5 Li YP, Ramirez S, Mikkelsen L *et al.* Efficient infectious cell culture systems of the hepatitis C virus (HCV) prototype strains HCV-1 and H77. *J Virol* 2015;**89**(1):811-23.
- 6 Ramirez S, Mikkelsen LS, Gottwein JM *et al.* Robust HCV Genotype 3a Infectious Cell Culture System Permits Identification of Escape Variants With Resistance to Sofosbuvir. *Gastroenterology* 2016;**151**(5):973-85.
- 7 Pham LV, Ramirez S, Gottwein JM *et al.* HCV Genotype 6a Escape From and Resistance to Velpatasvir, Pibrentasvir, and Sofosbuvir in Robust Infectious Cell Culture Models. *Gastroenterology* 2018;**154**(8):2194-208.

- 8 Gottwein JM, Scheel TK, Callendret B *et al.* Novel infectious cDNA clones of hepatitis C virus genotype 3a (strain S52) and 4a (strain ED43): genetic analyses and in vivo pathogenesis studies. *J Virol* 2010;**84**(10):5277-93.
  
- 9 Gottwein JM, Scheel TK, Jensen TB *et al.* Differential efficacy of protease inhibitors against HCV genotypes 2a, 3a, 5a, and 6a NS3/4A protease recombinant viruses. *Gastroenterology* 2011;**141**(3):1067-79.
